1 **Th17/regulatory T cells balance is predictive of *Coccidioides* infection outcome in pediatric**  
2 **patients**

3 Dan Davini<sup>1</sup>, Fouzia Naeem<sup>2</sup>, Aron Phong<sup>3</sup>, Mufadhal Al-Kuhlani<sup>1</sup>, Kristen M. Valentine<sup>1,6</sup>,  
4 James McCarty<sup>4</sup>, David M. Ojcius<sup>5,6</sup>, David M. Gravano<sup>3,6</sup>, Katrina K. Hoyer<sup>1,6</sup>

5  
6 <sup>1</sup>Department of Molecular Cell Biology, School of Natural Sciences, University of California  
7 Merced, Merced, CA

8 <sup>2</sup>Valley Children's Healthcare, Madera, CA

9 <sup>3</sup>Stem Cell Instrumentation Foundry, University of California Merced, Merced, CA

10 <sup>4</sup>Stanford University School of Medicine, Stanford, CA

11 <sup>5</sup>University of the Pacific, Arthur Dugoni Dental School, San Francisco, CA

12 <sup>6</sup>Health Sciences Research Institute, University of California Merced, Merced, CA

13

14 **Corresponding author:** Katrina K. Hoyer, Ph.D., 209-228-4229; khoyer2@ucmerced.edu

15

16 **Running title:** Tregs predict Valley fever outcome

17 **Key words:** *Coccidioides*; Immune response; Regulatory T cells; Helper T cells; Valley fever;

18 Pediatric

19 **Issue Section:** Major Article

20 **Word count:** Abstract 236; Text 3219

21

22 **FOOTNOTES**

23 *Conflict of interest.* The authors have nothing to disclose.

24

25 *Financial support.* This work was funded by the Blum Center; Valley Children's Healthcare; the  
26 University of California Merced Health Sciences Research Institute; and by a gift from Dr. E.W.  
27 & Dorothy Bizzini.

28

29 *Presentations.* This work has been presented at the 7th International Coccidioidomycosis  
30 Symposium and at the 2018 Federation of Clinical Immunology Societies Annual Meeting.

31

32 *Correspondence.* Katrina K. Hoyer, Ph.D., Molecular and Cell Biology Department, University  
33 of California Merced, 5200 N. Lake Rd., CA 95343. ORCID: 0000-0001-5443-0733; Phone:  
34 209-228-4229; Email: khoyer2@ucmerced.edu

35

36 **ABSTRACT**

37 Background: Protective immunity against the fungal pathogen *Coccidioides* requires specific T  
38 helper responses. Mouse vaccine and infection studies have defined CD4<sup>+</sup> T helper (Th)1 and  
39 Th17 cells in the resolution of infection and in effective protection. Patients with persistent  
40 *Coccidioides* infection demonstrate reduced cellular responses.

41 Methods: Peripheral blood and serum were collected from 30 pediatric *Coccidioides*-infected  
42 patients and 20 healthy controls in the California San Joaquin Valley. Samples were evaluated by  
43 flow cytometry for innate and adaptive immune populations and cytokines to define the early  
44 immune response and identify clinically useful biomarkers for predicting disease outcome.  
45 Clinical and flow data were evaluated according to disease outcome (resolved or persistent)  
46 using principal component analysis, high-dimensional flow cytometry analysis tools, chi-square  
47 automatic interaction detection, and individual cell population comparisons.

48 Results: Patients with persistent infection had lower Th17 and higher Treg frequencies, but  
49 similar Th1 responses, relative to patients that resolved disease. Treg frequency, eosinophil  
50 numbers and neutrophil numbers together distinguish patients that resolve infection from those  
51 that develop persistent infection.

52 Conclusions: The inability to resolve *Coccidioides* infection may be a result of elevated Treg  
53 frequency and functional capacity, and Treg frequency may predict patient disease outcome at  
54 diagnosis. In our study, Th1 responses were similar in persistent and resolved infection, in  
55 contrast to prior human studies. Instead, our data suggest that Th17 cells provide an effective  
56 protection during *Coccidioides* infection, and that elevated Treg frequency inhibits protective  
57 immunity.

58

## 59 INTRODUCTION

60 Coccidioidomycosis, also known as Valley fever, is caused by a fungal pathogen endemic to the  
61 San Joaquin Valley in California, Arizona, northern Mexico and arid areas of South America [1].  
62 Population expansion, travel, improved detection and/or climate changes appear to be  
63 contributing to an expanding endemic region. 40% of those infected develop symptomatic  
64 pneumonia that typically resolves without anti-fungal therapy, although disease can become  
65 chronic and disseminate outside the lungs [1]. Persistent coccidioidomycosis is thought to be due  
66 to poor or ineffective cellular immunity.

67  
68 Cellular immune responses are critical for effective immunity to *Coccidioides* infection [2, 3].  
69 Early mouse studies indicate a need for T helper 1 (Th1) responses in protective immunity [4].  
70 More recent studies highlight a role for Th17 cells and IL-17 cytokine responses [5-9]. Effective  
71 Th1 responses have been linked to resolution of human *Coccidioides* infection [10, 11]; however,  
72 Th17 effectors are critical for clearance of many other fungal pathogens.

73  
74 Tregs function to control immune responses during infection and disease [12]. Th17 and Treg  
75 differentiation are inversely regulated, with IL-6 promoting TGF $\beta$ -induction of Th17 cells and  
76 inhibiting TGF $\beta$ -induction of Tregs [13-15]. An appropriate balance in T effector and regulatory  
77 cells allows effective immune responses while limiting tissue damage. Very little is known about  
78 the role of Tregs in the regulation of the immune response during *Coccidioides* infection. In mice  
79 infected with *Coccidioides posadasii*, Treg expansion correlated with reduced survival [16]. In  
80 other fungal infections, Treg expansion correlates with impaired T cell immunity and persistent  
81 disease [17-19]. IL-10, an anti-inflammatory cytokine produced by several adaptive immune

82 cells including Tregs, promotes survival of *Coccidioides* and is associated with less-effective  
83 immunity [20, 21]. Tregs secrete IL-10 as one cellular immune suppression mechanism.

84

## 85 **METHODS**

### 86 *Study enrollment and design*

87 Patients were enrolled and samples collected at Valley Children's Healthcare (VCH), a 355 bed  
88 Children's Hospital serving as tertiary referral center for 10 counties in central California. Thirty  
89 children aged 2-18 years with coccidioidomycosis diagnosed by positive coccidioidal serology or  
90 cultures demonstrating *Coccidioides species* were included. Of these, 15 were enrolled as  
91 inpatients and 15 as outpatients at the time of diagnosis. Twenty healthy siblings of hospital  
92 patients, with negative coccidioidal serology were enrolled as controls. Children known to be  
93 pregnant, immunocompromised and/or on immunosuppressive medications, with severe  
94 underlying illness, cystic fibrosis, or inflammatory diseases were excluded. The study was  
95 approved by the VCH institutional review board. Written informed consent was obtained from  
96 legal guardians and participants >7 years of age. Baseline demographic, clinical, laboratory,  
97 radiographic, antifungal treatment and outcome data were collected. Outcomes were defined as  
98 resolved or persistent infection at the time of study conclusion. Resolution of symptoms,  
99 abnormal radiographic and clinical laboratory findings defined disease resolution. Persistent  
100 disease was defined as still on therapy without complete resolution of symptoms and/or  
101 persistent abnormal radiographic or laboratory findings.

102

103 Patients were characterized by 42 clinical parameters (Supplemental Table 1), 51 immune cell  
104 population parameters (Supplemental Table 2), and 26 serum proteins. Frequency and total

105 number per milliliter of innate and adaptive immune populations were evaluated in the peripheral  
106 blood at the time of enrollment. We compared percentages, total number and activation state of  
107 immune cells in patients based on disease outcome (healthy control, resolved, persistent) and  
108 hospital status at time of blood draw (inpatient, outpatient).

109

110 *Serum and peripheral blood collection.*

111 1ml whole blood collected in sodium heparin tubes was stored at room temperature, and  
112 processed within 24-hours for flow cytometry. 1ml collected in red-cap plug tubes was  
113 centrifuged at 3500rpm for 15min then transferred into new tubes for  $-20^{\circ}\text{C}$  storage.

114

115 *PBMC flow cytometric analysis.*

116 Antibody staining was performed in PBS/2%FBS. 100 $\mu\text{L}$  of whole blood was incubated with  
117 5 $\mu\text{L}$  of Human TruStain FcX (Biolegend) for 5min prior to staining. Three flow cytometry  
118 panels were designed to profile PBMCs (Supplemental methods). A single blood sample was  
119 processed three times such that 50 $\mu\text{L}$  of antibody for each panel was added and incubated for  
120 20min. RBCs were lysed in 1-step Fix/Lyse Solution (eBioscience) for 25min and resuspended  
121 with 300 $\mu\text{L}$  PBS/2%FBS and 100 $\mu\text{L}$  of 123count-eBeads (eBioscience) for flow cytometry  
122 analysis. Stained PBMC were acquired on an LSRII (BD), and analyzed using FCS Express  
123 (DeNovo Software) FACS Diva (BD).

124

125 To ensure consistent cytometer calibration and data collection, voltage and compensation  
126 parameters were standardized using SPHERO Ultra Rainbow Calibration Particle Kits  
127 (Spherotech, Inc.). Consistent MFI for each fluorophore was maintained by small adjustments to

128 voltage parameters if baseline MFI changes were >10% between experiments. Fluorophore  
129 compensation was maintained with antibody single stains mixed from 1 $\mu$ L of each antibody into  
130 UltraComp eBeads (Bioscience), washed with PBS/2%FBS, incubated for 15min, and  
131 resuspended in 500 $\mu$ L PBS/2%FBS.

132

133 *High-dimensional flow cytometry analysis.*

134 FCS files were loaded into Cytobank ([www.cytobank.org](http://www.cytobank.org)), and pre-gated to remove counting  
135 beads, debris, doublets, and dead cells. Remaining cells were gated on CD4+CD45+, grouped on  
136 outcome, and analyzed using CITRUS and viSNE. File internal compensation was utilized,  
137 clusters characterized on abundance, event sampling equalized per file, minimum cluster size set  
138 to 0.5%, and Significance Analysis of Microarrays (SAM) correlative model utilized. CITRUS  
139 analysis was repeated three independent times to confirm stratifying signatures and statistically  
140 significant populations (discovery rate <1%). viSNE map was generated from 373,781 total  
141 events (12,889/patient) using 2500 iterations, a perplexity of 90, and a Theta of 0.3.

142

143 *Cytokine assay.*

144 Thawed serum was centrifuged at 1000xg for 5min to remove particulates. Serum cytokine  
145 concentrations were determined using LEGENDplex Human 13-plex kits, 'Th Cytokine Panel'  
146 and 'Cytokine Panel 2' bead-based immunoassay kits (Biolegend) in duplicate according to the  
147 manufacturer's instructions. Samples were diluted 2-fold with kit Assay Buffer prior to assay  
148 initiation. Samples were analyzed by flow cytometry and processed using LEGENDplex Data  
149 Analysis Software. Standard curves were generated using a 5-parameter curve-fitting model and  
150 cytokine levels were calculated as the average of the duplicate measurements.

151  
152 *Data analysis and statistics.*  
153 Leukocyte subset total numbers were calculated using counting beads in combination with each  
154 leukocyte percentage determined by flow cytometry. Statistical analyses were performed using  
155 Prism software v6.0 (GraphPad Software). One-way ANOVA with Bonferroni correction was  
156 used to compare multiple groups with a 95% confidence interval. The Fisher's exact test was  
157 used to compare the distribution of groups and percentages. PCA and CHAID analyses were  
158 performed using XLSTAT.

159

## 160 **RESULTS:**

### 161 **Patient characteristics**

162 Thirty pediatric patients with a diagnosis of coccidioidomycosis (15 inpatients and 15  
163 outpatients) and 20 healthy controls were enrolled. One inpatient died due to disease severity and  
164 was excluded from analysis. Of the thirty patients with coccidioidomycosis, 25 had pulmonary  
165 involvement and five had disseminated disease including the deceased patient. Resolved disease  
166 was observed in 13 (44.8%) patients and persistent disease in 16 (55.2%), including 12 with  
167 pulmonary and 4 with disseminated disease.

168  
169 Age and ethnicity, as well as the incidence of chest pain, night sweats, weight loss and fatigue  
170 symptoms were similar between the groups, and did not correlate with disease outcome (Table 1  
171 and Table 2). More females than male patients were enrolled in the study, but this is unlikely to  
172 be due to an increased incidence in female children [22, 23]. Regardless of disease severity or  
173 outcome, most patients experienced fever. As observed previously, erythema nodosum mildly



174 correlated with a better disease prognosis ( $p=0.0722$ ). Evaluating complete blood count (CBC)  
175 measurements, inpatients had higher neutrophil, eosinophil, WBC and platelet numbers, and  
176 lower lymphocyte numbers compared to outpatients (Supplemental Figure 1). Eosinophil,  
177 platelet and creatinine (Cr) levels were elevated and lymphocyte counts reduced in patients with  
178 persistent disease compared to patients that resolved infection. Although some CBC parameters  
179 were significantly different between the groups, there was considerable overlap in values and  
180 these small variations would be difficult to use in predicting disease outcome. Serum IgM, IgG  
181 and antibody titers from *Coccidioides* enzyme immunoassay and complement fixation (CF)  
182 assays did not correlate with disease outcome, and were not different between inpatient and  
183 outpatients (Supplemental Table 3).

184  
185 Analysis of immune parameters based on hospital status revealed several differences between  
186 inpatients and outpatients in both innate and adaptive responses. Plasmacytoid dendritic cell  
187 frequency was reduced in inpatients relative to healthy controls and outpatients (Figure 1A).  
188  $CD4^+$ ,  $CD8^+$  and B cell frequency was reduced in inpatients, and mild elevation of Th1 was  
189 observed (Figure 1B, C). These differences likely reflect the more severe illness, elevated  
190 inflammatory responses and ineffective adaptive and Th cell immunity of the inpatients. A larger  
191 proportion of inpatients versus outpatients was unable to resolve *Coccidioides* infection, and  
192 included the four patients with disseminated disease, suggesting the more severe disease at  
193 diagnosis, the more likely that disease will persist.

194

195 **Specific adaptive immune responses distinguish disease outcome**

196 No differences were observed in the frequency or total number of innate immune populations  
197 based on disease outcome (data not shown). Patients with persistent disease tended to have lower  
198 adaptive immune cell frequency, in particular a significant reduction in B cell frequency relative  
199 to healthy controls and resolved patients (Figure 2A). Persistent patients also had fewer Tfh cells,  
200 important for effective and diverse antibody responses. Current paradigm suggests that a strong  
201 Th1 response is required for controlling *Coccidioides* infection. Patients with IFN $\gamma$ R or Stat1  
202 mutations that reduce Th1 responses have more severe, disseminated infection [24]. Th1  
203 frequencies were similar between patients with resolved and persistent disease (Figure 2B),  
204 while patients with persistent disease had lower Th17 and higher Treg frequencies than patients  
205 that resolved disease.

206  
207 Immune cells secrete inflammatory and effector cytokines to induce cell migration,  
208 differentiation and function. We evaluated the concentration of 26 inflammatory and Th  
209 cytokines (Figure 3A). As cytokines were evaluated in serum, and not from stimulated cell  
210 supernatants, most cytokines were expressed at just above the limit of detection (LOD). IL-1 $\alpha$ ,  
211 IL-1 $\beta$ , IL-5, IL-12p70, IL-21 and IL-22 were below the LOD for all patients (not shown).  
212 Significant differences in IL-6, IL-18 and IL-12, and mild difference in IL-10, were observed  
213 between patients with resolved and persistent disease, and all of these were increased relative to  
214 healthy controls (Figure 3B). IL-6, IL-18 and IL-12 are produced by antigen presenting cells and  
215 promote T effector differentiation. IL-10, an immunosuppressive cytokine, is expressed by  
216 several immune populations, including Tregs. IL-18 inhibits Th17 and promotes Treg  
217 differentiation and function [25, 26].

218

## 219 **Predictive biomarkers of disease outcome identified**

220 To identify predictive biomarkers we performed principle component analysis (PCA) using all  
221 non-diagnostic clinical, immune population and cytokine parameters. PCA analysis separated  
222 patients from healthy controls, and inpatients from outpatients, but was unable to distinguish  
223 patients with resolved versus persistent disease (Figure 4A). PCA comparison, using all  
224 parameters, only described 31.9% of variation in the hospital status data and 26.3% of variation  
225 in the disease outcome data, indicating that some parameters are too variable to include as a  
226 means to distinguish patients. Chi-square automatic interaction detection (CHAID), a decision  
227 tree technique, was used to define a predictive method for disease outcome. Treg frequency had  
228 the greatest impact on disease outcome of all clinical and immune parameters (Figure 4B). Treg  
229 frequency at diagnosis distinguished disease outcome in 79.3% of patients (11/13 resolved and  
230 12/16 persistent disease). Eosinophil, neutrophil and Th17 numbers further defined patients  
231 within these disease outcomes (not shown). PCA using the parameters identified by CHAID in  
232 the first two levels of separation (%CD4<sup>+</sup>Treg, eosinophils and neutrophils), predicted disease  
233 outcome in 89.7% (26/29) of patients.

234

## 235 **Unbiased high-dimensional flow cytometry analysis reveals CCR5 as a biomarker of** 236 **persistent disease**

237 We applied high-dimensional flow cytometry analysis tools to identify cellular populations that  
238 predict disease outcome. We utilized CITRUS, a tool that identifies stratifying cellular signatures  
239 that differ between grouped data [27]. After pre-gating CD4<sup>+</sup>CD45<sup>+</sup> T cells, we utilized CD127  
240 (IL-7R $\alpha$ ), CXCR5 (CD185), CCR3 (CD193), CCR5 (CD195), CCR6 (CD196), CD25 (IL-2R $\alpha$ ),  
241 and HLA-DR to cluster the data. Comparing resolved versus persistent disease patients, CITRUS

242 identified several cell populations that stratified the data at a 1% false discovery rate, including  
243 one population representing Tregs (Figure 5A). CITRUS clusters revealed CCR5 (CD195) as  
244 expressed more highly in persistent patients; specifically, elevated CCR5 stratified Tregs. The  
245 frequency of the CCR5+Treg population was higher in persistent than resolved disease (Figure  
246 5B). CCR5 is critical for Treg migration into tissues [28].

247  
248 Performing viSNE, a dimensionality reduction and data visualization tool [29], we confirmed a  
249 region of Tregs that could be divided on CCR5 expression. (Figure 5C) [29, 30]. CCR5<sup>+</sup>Tregs  
250 were significantly elevated in patients with persistent disease as compared to patients who  
251 resolved infection, while CCR5<sup>neg</sup>Treg frequency was unchanged (Figure 5D). High-dimensional  
252 analysis confirms a Treg disparity based on disease outcome, and reveals CCR5 as a functional  
253 marker associated with chronicity.

254

## 255 **DISCUSSION**

256 We identified several clinical measurements and immune populations that together provide  
257 potential biomarkers for predicting disease outcome in *Coccidioides*-infected patients. Elevated  
258 Treg frequency was the major indicator of persistent infection. Most patients with persistent  
259 disease remain on anti-fungal treatments for months to years, with risk of fungal reactivation  
260 upon therapy discontinuation. Understanding host immune responses leading to dissemination,  
261 persistent infection or resolution of infection may allow clinicians to identify patients with  
262 persistent infection earlier.

263

264 Patients with persistent disease appear to develop an inappropriately prolonged innate immune  
265 response, and ineffective adaptive immune activation to *Coccidioides* infection. Expanded  
266 neutrophils and eosinophils indicate that the innate immune system in these patients mounts an  
267 inflammatory response, in contrast to reduced lymphocyte frequencies. As lymphocytes and  
268 appropriate CD4<sup>+</sup> T cell responses are required for immune control of *Coccidioides*, patients  
269 with persistent infection likely do not have sufficient activated lymphocyte numbers to control  
270 infection. Resolution of infection appears to require a Th17, but not a Th1, response that is  
271 reduced in patients with persistent infection.

272  
273 The four patients who developed disseminated infection had significantly reduced alanine  
274 transaminase (ALT) levels compared to resolved patients (p=0.0014; not shown), indicating liver  
275 dysfunction not previously described in disseminated coccidioidomycosis, although elevated  
276 aspartate aminotransferase:ALT ratio is observed in disseminated histoplasmosis [31]. We  
277 observed trends indicating reduced adaptive immune responses (reduced CD4<sup>+</sup>, CD8<sup>+</sup>, B, and  
278 Th17 cells) and ineffective innate immune responses (elevated classical monocytes) [32]. Further  
279 study of disseminated infection is needed to clarify the immune responses in disseminated  
280 coccidioidomycosis.

281  
282 Tregs suppress T cell activation and effector mechanisms [30]. Enhanced Treg ratios and  
283 suppressive function may block appropriate adaptive immune responses, enabling prolonged  
284 fungal infection, resulting in persistent infection. Elevated Treg frequency provided the best  
285 biomarker for identifying these patients at diagnosis, suggesting that Tregs may suppress  
286 appropriate immune responses during *Coccidioides* infection. Alternatively, as Tregs and Th17

287 cells differentiate through reciprocal pathways, Tregs may be generated at the expense of Th17  
288 cells required for fungal clearance, resulting in persistent infection [15]. These patients may have  
289 naturally high Treg frequencies before infection, or as suggested by the significant elevation in  
290 Treg frequency relative to healthy controls, may ineffectively induce peripheral Tregs instead of  
291 Th17 effectors. Serum cytokine levels in patients with persistent infection further support the  
292 possibility of inappropriate T cell differentiation. IL-18 inhibits Th17 and enhances Treg  
293 differentiation and function, which could explain persistent infection in these patients [25, 26].

294  
295 In *Paracoccidioides brasiliensis* infection Treg frequency and suppressive function is enhanced  
296 relative to controls [18]. Our results support a similar finding in *Coccidioides* infection, with  
297 higher Treg frequencies indicative of persistent infection, and markers of suppressive Treg  
298 function. CITRUS analysis revealed a higher CCR5<sup>+</sup>Treg frequency in persistent infection.  
299 CCR5<sup>+</sup>Tregs have enhanced suppressive capacity compared to CCR5<sup>neg</sup>Tregs [33]. CCR5-  
300 deficient mice have an enhanced ability to combat *Paracoccidioides brasiliensis* infection, and  
301 elevated Th17 response to *Histoplasma* infection, resulting in a Treg/Th17 imbalance [34, 35].  
302 We speculate that Treg expansion and elevated functionality prevent appropriate Th17 effector  
303 responses allowing persistent *Coccidioides* infection.

304  
305 The elevated Treg frequency and potential suppressive functionality is consistent with our  
306 understanding of Tregs in infection, and with the inverse relationship in Th17 and Treg  
307 differentiation. It is tempting to propose that manipulating Tregs or Th17 cells could improve  
308 prognosis for *Coccidioides*-infected patients. Further predictive modeling is needed to confirm  
309 our findings, and better understand the Treg phenotype during infection. To our knowledge, this

310 is the first pediatric study demonstrating higher Treg and lower Th17 levels in patients who  
311 cannot clear infection. These markers could identify patients earlier in their disease course who  
312 would benefit from prolonged treatment course, and close monitoring for disease relapse once  
313 off therapy.

314

### 315 **FUNDING**

316 This work was funded by the Blum Center; Valley Children's Healthcare; the University of  
317 California Merced Health Sciences Research Institute; and by a gift from Dr. E.W. & Dorothy  
318 Bizzini.

319

### 320 **ACKNOWLEDGMENTS**

321 We thank Padma Desai and Christine Banda for clinical enrollment support, our patients for  
322 participating in the study, Dr. Larry Fong for helpful discussions, the UC Merced Stem Cell  
323 Instrumentation Foundry for their assistance in flow cytometry design, and the UC Merced  
324 Biostatistics and Data Support Core for consultation on statistical methods.

325

326 **FIGURE LEGENDS**

327 **Figure 1. Immune parameters based on patient hospital status.** PBMCs from healthy and  
328 *Coccidioides*-infected patients were assessed by flow cytometry. A) Comparisons of monocytes  
329 and dendritic cell frequencies. Frequency comparisons of adaptive immune populations CD4<sup>+</sup>,  
330 CD8<sup>+</sup> and B cells (B), and of CD4<sup>+</sup> T helper subsets as a percentage of CD4<sup>+</sup> T cells (C). Each  
331 dot represents an individual patient, and lines indicate the mean. ANOVA with Bonferroni  
332 correction was used to compare multiple groups with a 95% confidence interval; \* p<0.05, \*\*  
333 p<0.005, \*\*\* p<0.0005.

334  
335 **Figure 2. T helper cells determine disease outcome.** PBMCs from acute disease were  
336 incubated with antibodies and the percentage of adaptive immune populations (A) and T helpers  
337 (B) determined by flow cytometry. T helper subset frequencies are represented as percentage  
338 positive within the CD4<sup>+</sup>CD45<sup>+</sup> gate. Samples were separated by healthy, resolved or persistent  
339 infection. Long lines indicate the mean, and each dot represents an individual patient. ANOVA  
340 with Bonferroni correction was used to compare multiple groups with a 95% confidence interval;  
341 \* p<0.05, \*\* p<0.005, \*\*\* p<0.0005.

342  
343 **Figure 3. Serum cytokine data.** Serum was incubated with a panel of cytokine antibodies and  
344 the concentration determined by flow cytometric analysis. Samples were separated by healthy,  
345 resolved or persistent infection. A) Cytokines are shown with the mean and SEM. IL-1 $\alpha$ , IL-1 $\beta$ ,  
346 IL-5, IL-12p70, IL-17A, IL-21, and IL-22 were below the LOD, and are not shown. B)  
347 Individual cytokines are shown with each dot representing an individual patient. Samples at or



348 below the LOD are shown at the LOD. ANOVA, then a Fisher's Least Significant Difference  
349 was performed; \*  $p < 0.05$ , \*\*  $p < 0.005$ .

350

351 **Figure 4. PCA and CHAID analysis reveals a relationship between Treg frequency and**

352 ***Coccidioides* infection.** A) PCA using 119 clinical and flow cytometry parameters of controls,

353 inpatients and outpatients (left graph), or controls, resolved and persistent disease (right graph).

354 B) CHAID analysis on persistent and resolved patients identifies a relationship between %CD4<sup>+</sup>

355 Treg and disease outcome. C) PCA analysis on persistent and resolved patients using eosinophil

356 and neutrophil numbers, and %CD4<sup>+</sup> Treg parameters.

357

358 **Figure 5: CCR5<sup>+</sup> Tregs are a significant predictor of disease outcome.** CITRUS analysis was

359 performed comparing persistent and resolved patients. Within the CD4<sup>+</sup>CD45<sup>+</sup> population,

360 CITRUS identified several differential cell clusters that separated patient groups. CD127, CCR5,

361 and CD25 expression is shown for the Treg cluster (A). Box plots display the frequencies of the

362 significant Treg cluster between persistent versus resolved patients demonstrating this cluster is

363 elevated in patients who go on to have persistent infection (B). (C) viSNE heatmaps were

364 generated for CD25, CD127, and CCR5 on two representative patients. Gates were drawn around

365 two Treg (CD4<sup>+</sup>CD45<sup>+</sup>CD127<sup>low</sup>CD25<sup>+</sup>) clusters based on CCR5 expression. %CCR5<sup>+</sup> Tregs

366 and %CCR5<sup>neg</sup> Tregs was determined across all samples (D). An unpaired student's t-test was

367 performed.

368

369

370 **REFERENCES**

- 371 1. Johnson L, Gaab EM, Sanchez J, et al. Valley fever: danger lurking in a dust cloud.  
372 *Microbes and infection* **2014**; 16(8): 591-600.
- 373 2. Kelley JB, Stanfield AB, Dukes CD, Parsons JL. Advanced human lymphocyte response  
374 to coccidioidin in vitro following skin test. *Annals of allergy* **1969**; 27(6): 265-70.
- 375 3. Catanzaro A, Spittler LE, Moser KM. Cellular immune response in coccidioidomycosis.  
376 *Cellular immunology* **1975**; 15(2): 360-71.
- 377 4. Hung CY, Castro-Lopez N, Cole GT. Card9- and MyD88-Mediated Gamma Interferon  
378 and Nitric Oxide Production Is Essential for Resistance to Subcutaneous *Coccidioides*  
379 *posadasii* Infection. *Infection and immunity* **2016**; 84(4): 1166-75.
- 380 5. Hung CY, Hurtgen BJ, Bellecourt M, Sanderson SD, Morgan EL, Cole GT. An agonist of  
381 human complement fragment C5a enhances vaccine immunity against *Coccidioides*  
382 infection. *Vaccine* **2012**; 30(31): 4681-90.
- 383 6. Wuthrich M, Gern B, Hung CY, et al. Vaccine-induced protection against 3 systemic  
384 mycoses endemic to North America requires Th17 cells in mice. *The Journal of clinical*  
385 *investigation* **2011**; 121(2): 554-68.
- 386 7. Hung CY, Jimenez-Alzate Mdel P, Gonzalez A, Wuthrich M, Klein BS, Cole GT.  
387 Interleukin-1 receptor but not Toll-like receptor 2 is essential for MyD88-dependent  
388 Th17 immunity to *Coccidioides* infection. *Infection and immunity* **2014**; 82(5): 2106-14.
- 389 8. Nesbit LA, Knox KS, Nguyen CT, et al. Immunological characterization of  
390 bronchoalveolar lavage fluid in patients with acute pulmonary coccidioidomycosis. *The*  
391 *Journal of infectious diseases* **2013**; 208(5): 857-63.

- 392 9. Hurtgen BJ, Hung CY, Ostroff GR, Levitz SM, Cole GT. Construction and evaluation of  
393 a novel recombinant T cell epitope-based vaccine against *Coccidioidomycosis*. *Infection*  
394 and immunity **2012**; 80(11): 3960-74.
- 395 10. Ampel NM, Nesbit LA, Nguyen CT, et al. Cytokine Profiles from Antigen-Stimulated  
396 Whole-Blood Samples among Patients with Pulmonary or Nonmeningeal Disseminated  
397 *Coccidioidomycosis*. *Clinical and vaccine immunology : CVI* **2015**; 22(8): 917-22.
- 398 11. Duplessis CA, Tilley D, Bavaro M, Hale B, Holland SM. Two cases illustrating  
399 successful adjunctive interferon-gamma immunotherapy in refractory disseminated  
400 *coccidioidomycosis*. *The Journal of infection* **2011**; 63(3): 223-8.
- 401 12. Maizels RM, Smith KA. Regulatory T cells in infection. *Advances in immunology* **2011**;  
402 112: 73-136.
- 403 13. Astry B, Venkatesha SH, Moudgil KD. Involvement of the IL-23/IL-17 axis and the  
404 Th17/Treg balance in the pathogenesis and control of autoimmune arthritis. *Cytokine*  
405 **2015**; 74(1): 54-61.
- 406 14. Locke NR, Patterson SJ, Hamilton MJ, Sly LM, Krystal G, Levings MK. SHIP regulates  
407 the reciprocal development of T regulatory and Th17 cells. *Journal of immunology*  
408 (Baltimore, Md : 1950) **2009**; 183(2): 975-83.
- 409 15. Bettelli E, Carrier Y, Gao W, et al. Reciprocal developmental pathways for the  
410 generation of pathogenic effector TH17 and regulatory T cells. *Nature* **2006**; 441(7090):  
411 235-8.
- 412 16. Gonzalez A, Hung CY, Cole GT. Absence of phagocyte NADPH oxidase 2 leads to  
413 severe inflammatory response in lungs of mice infected with *Coccidioides*. *Microbial*  
414 *pathogenesis* **2011**; 51(6): 432-41.

- 415 17. Feriotti C, de Araujo EF, Loures FV, et al. NOD-Like Receptor P3 Inflammasome  
416 Controls Protective Th1/Th17 Immunity against Pulmonary Paracoccidioidomycosis.  
417 *Frontiers in immunology* **2017**; 8: 786.
- 418 18. Cavassani KA, Campanelli AP, Moreira AP, et al. Systemic and local characterization of  
419 regulatory T cells in a chronic fungal infection in humans. *Journal of immunology*  
420 (Baltimore, Md : 1950) **2006**; 177(9): 5811-8.
- 421 19. Bacher P, Kniemeyer O, Schonbrunn A, et al. Antigen-specific expansion of human  
422 regulatory T cells as a major tolerance mechanism against mucosal fungi. *Mucosal*  
423 *immunology* **2014**; 7(4): 916-28.
- 424 20. Hung CY, Castro-Lopez N, Cole GT. Vaccinated C57BL/6 mice develop protective and  
425 memory T cell responses to *Coccidioides posadasii* infection in the absence of  
426 interleukin-10. *Infection and immunity* **2014**; 82(2): 903-13.
- 427 21. Jimenez Mdel P, Walls L, Fierer J. High levels of interleukin-10 impair resistance to  
428 pulmonary coccidioidomycosis in mice in part through control of nitric oxide synthase 2  
429 expression. *Infection and immunity* **2006**; 74(6): 3387-95.
- 430 22. Galgiani JN, Ampel NM, Blair JE, et al. Coccidioidomycosis. *Clinical infectious*  
431 *diseases : an official publication of the Infectious Diseases Society of America* **2005**;  
432 41(9): 1217-23.
- 433 23. Gaab EM, Naeem F. Pediatric Coccidioidomycosis Patients: Perceptions, Quality of Life  
434 and Psychosocial Factors. *Healthcare (Basel, Switzerland)* **2015**; 3(3): 775-95.
- 435 24. Sampaio EP, Hsu AP, Pechacek J, et al. Signal transducer and activator of transcription 1  
436 (STAT1) gain-of-function mutations and disseminated coccidioidomycosis and  
437 histoplasmosis. *The Journal of allergy and clinical immunology* **2013**; 131(6): 1624-34.

- 438 25. Harrison OJ, Srinivasan N, Pott J, et al. Epithelial-derived IL-18 regulates Th17 cell  
439 differentiation and Foxp3(+) Treg cell function in the intestine. *Mucosal immunology*  
440 **2015**; 8(6): 1226-36.
- 441 26. Oertli M, Sundquist M, Hitzler I, et al. DC-derived IL-18 drives Treg differentiation,  
442 murine *Helicobacter pylori*-specific immune tolerance, and asthma protection. *The*  
443 *Journal of clinical investigation* **2012**; 122(3): 1082-96.
- 444 27. Bruggner RV, Bodenmiller B, Dill DL, Tibshirani RJ, Nolan GP. Automated  
445 identification of stratifying signatures in cellular subpopulations. *Proceedings of the*  
446 *National Academy of Sciences of the United States of America* **2014**; 111(26): E2770-7.
- 447 28. Yurchenko E, Tritt M, Hay V, Shevach EM, Belkaid Y, Piccirillo CA. CCR5-dependent  
448 homing of naturally occurring CD4+ regulatory T cells to sites of *Leishmania major*  
449 infection favors pathogen persistence. *The Journal of experimental medicine* **2006**;  
450 203(11): 2451-60.
- 451 29. Amir E-aD, Davis KL, Tadmor MD, et al. viSNE enables visualization of high  
452 dimensional single-cell data and reveals phenotypic heterogeneity of leukemia. *Nature*  
453 *Biotechnology* **2013**; 31: 545.
- 454 30. Liu W, Putnam AL, Xu-Yu Z, et al. CD127 expression inversely correlates with FoxP3  
455 and suppressive function of human CD4+ T reg cells. *The Journal of experimental*  
456 *medicine* **2006**; 203(7): 1701-11.
- 457 31. Spec A, Barrios CR, Ahmad U, Proia LA. AST to ALT Ratio is elevated in disseminated  
458 histoplasmosis as compared to localized pulmonary disease and other endemic mycoses.  
459 *Medical mycology* **2017**; 55(5): 541-5.

- 460 32. Beaman L, Holmberg CA. In vitro response of alveolar macrophages to infection with  
461 *Coccidioides immitis*. *Infection and immunity* **1980**; 28(2): 594-600.
- 462 33. Soler DC, Sugiyama H, Young AB, Massari JV, McCormick TS, Cooper KD. Psoriasis  
463 patients exhibit impairment of the high potency CCR5(+) T regulatory cell subset.  
464 *Clinical immunology (Orlando, Fla)* **2013**; 149(1): 111-8.
- 465 34. Kroetz DN, Deepe GS, Jr. CCR5 dictates the equilibrium of proinflammatory IL-17+ and  
466 regulatory Foxp3+ T cells in fungal infection. *Journal of immunology (Baltimore, Md :  
467 1950)* **2010**; 184(9): 5224-31.
- 468 35. Moreira AP, Cavassani KA, Massafra Tristao FS, et al. CCR5-dependent regulatory T  
469 cell migration mediates fungal survival and severe immunosuppression. *Journal of  
470 immunology (Baltimore, Md : 1950)* **2008**; 180(5): 3049-56.

471

Figure 1. Davini et al.

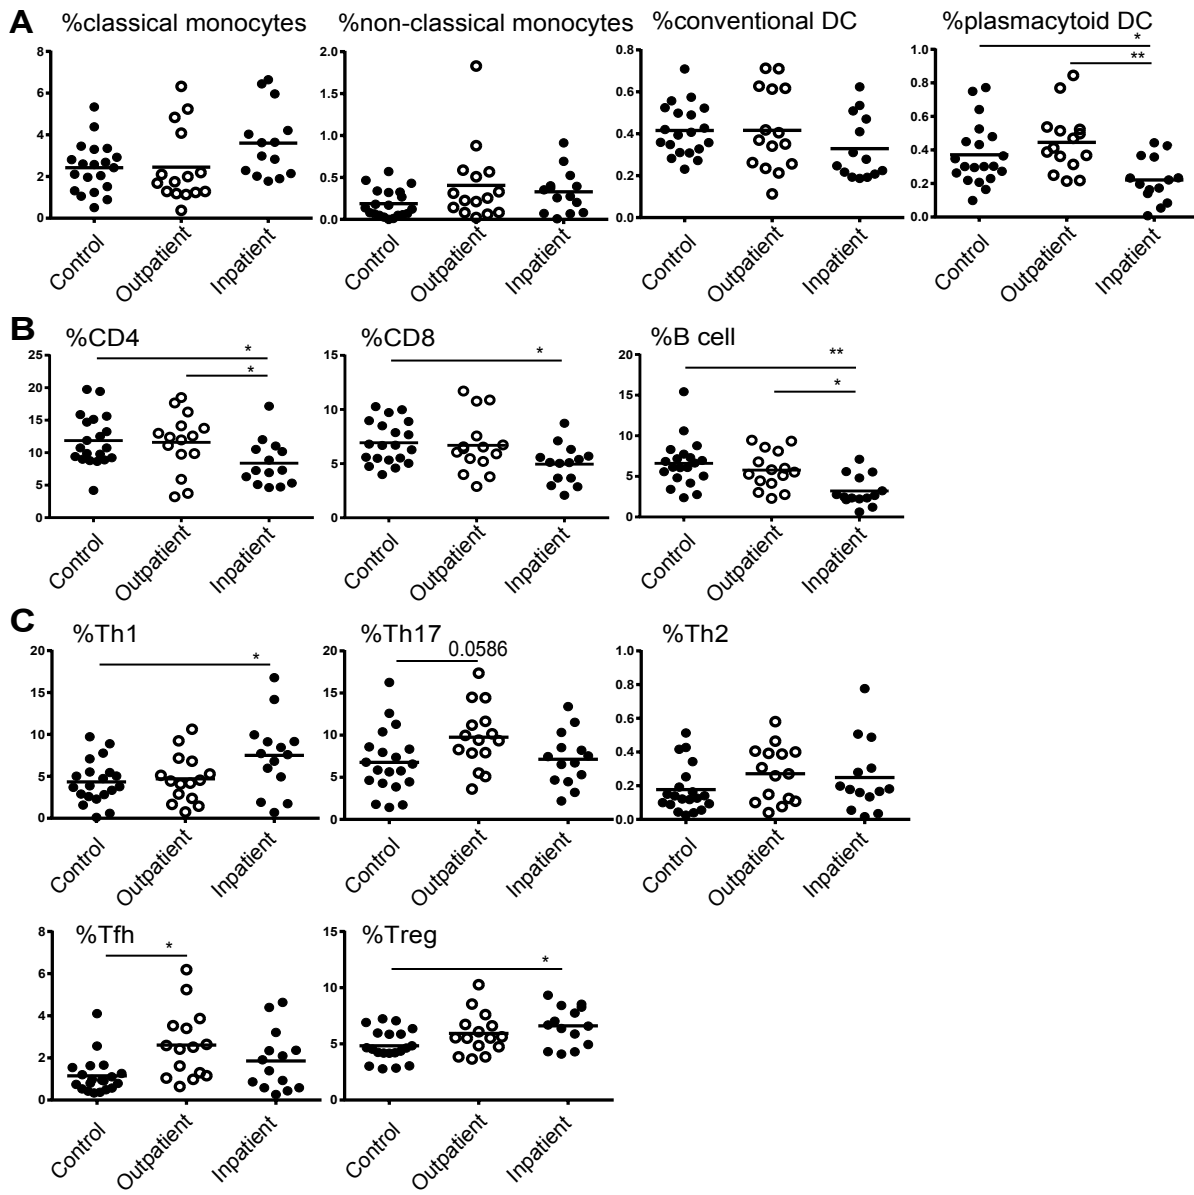

Figure 2. Davini et al.

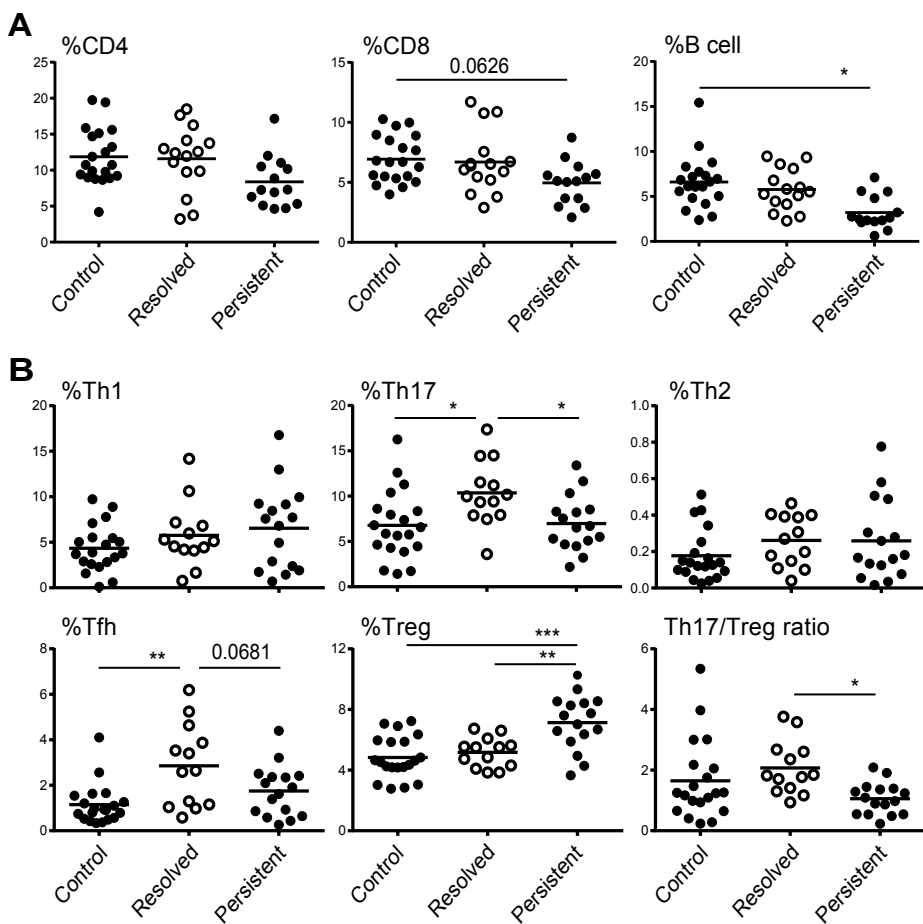





Figure 4. Davini et al.

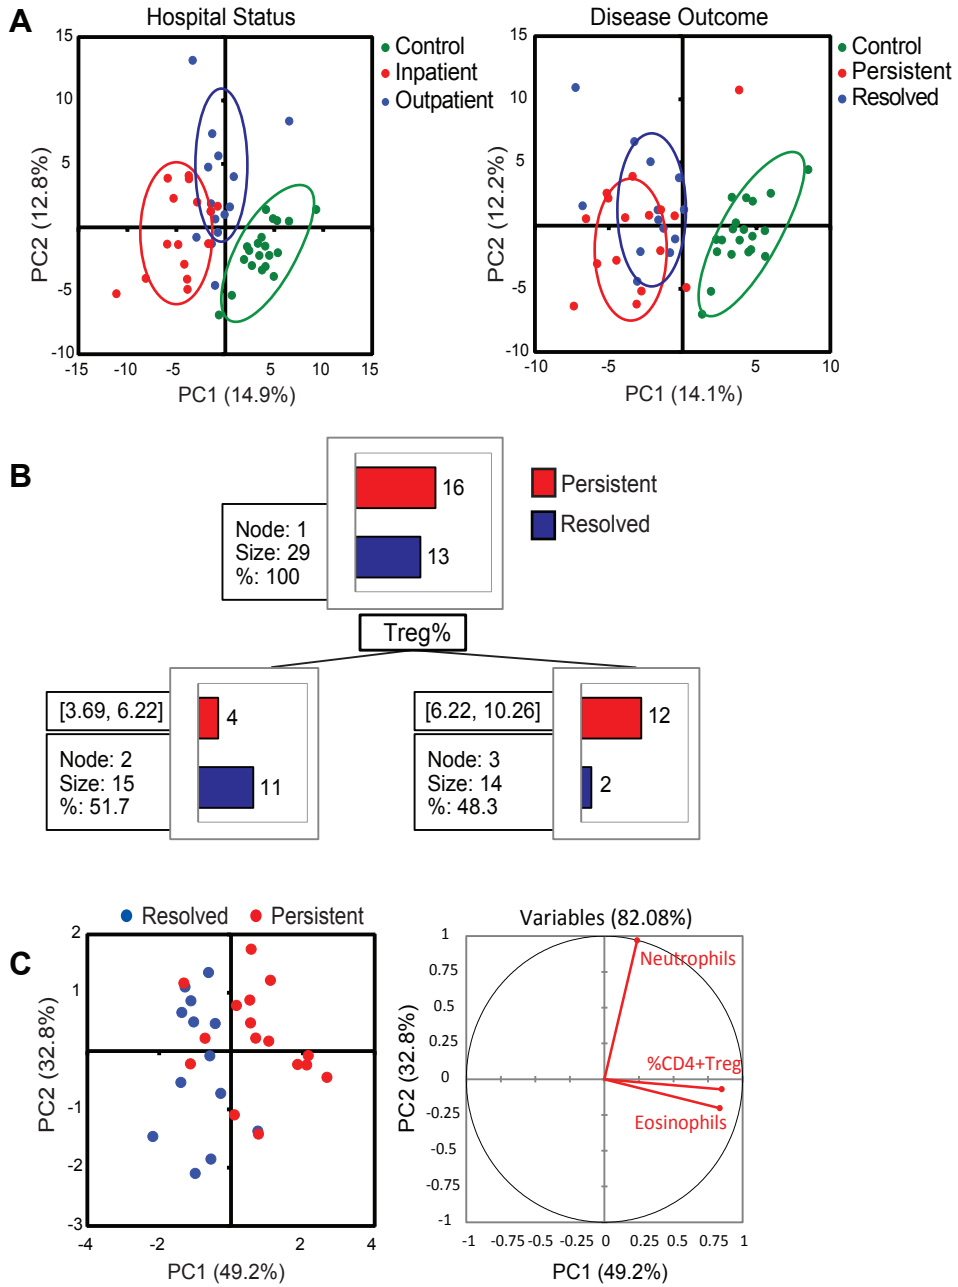

Figure 5. Davini et al.

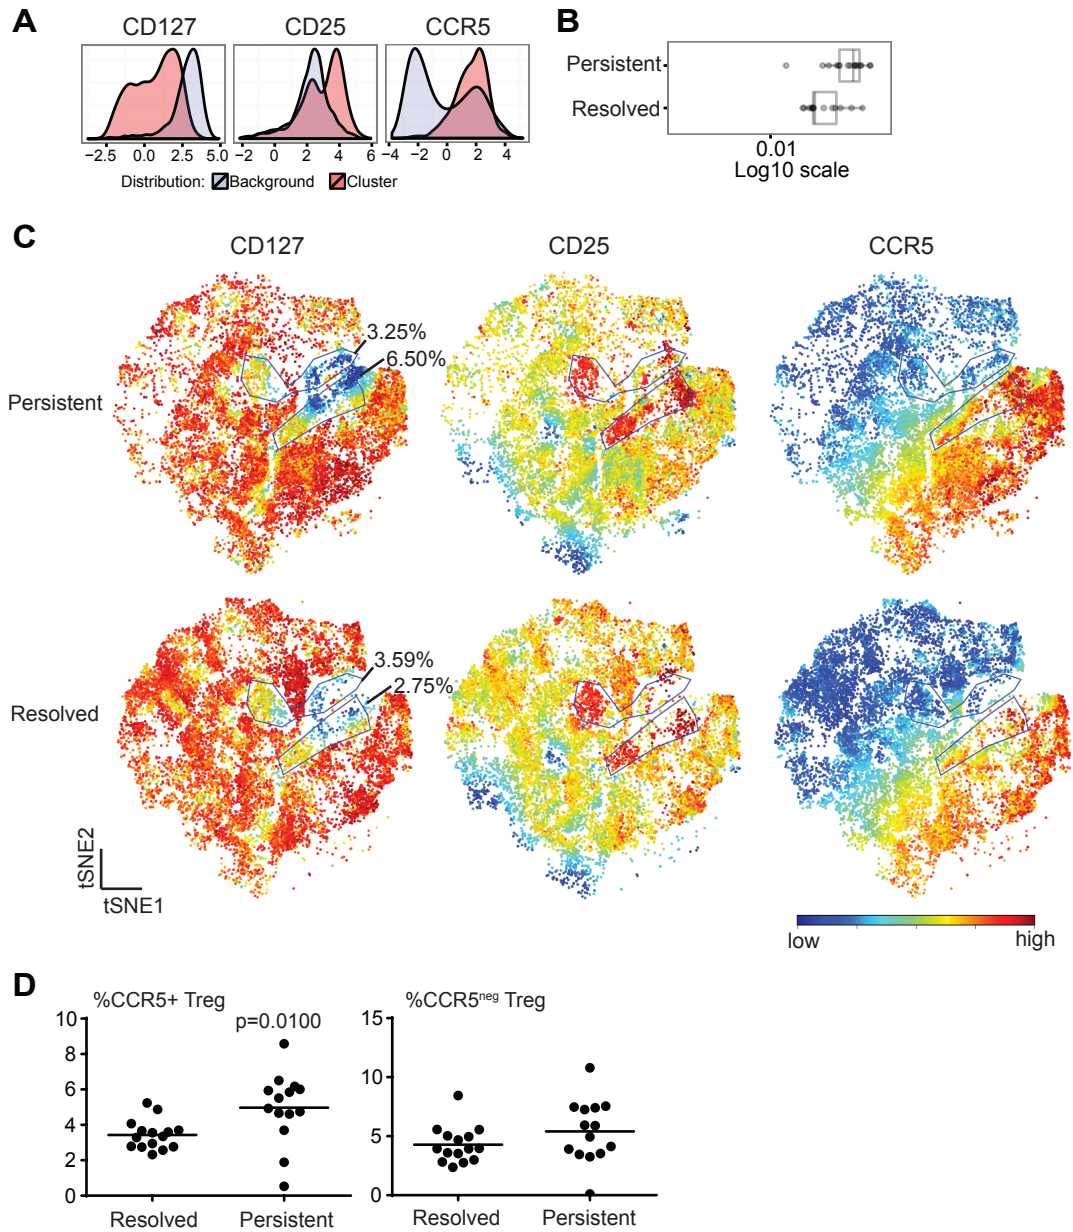

Table 1. Demographics of patients based on outcome status.

|                               | Healthy Controls<br>(n=20) | Resolved<br>(n=13) | Persistent<br>(n=16) |
|-------------------------------|----------------------------|--------------------|----------------------|
| Age (median, range), yrs      | 11, 3-16                   | 12, 6-18           | 13, 2-17             |
| Gender, n (%)                 |                            |                    |                      |
| Male                          | 11 (54%)                   | 3 (23.1%)          | 5 (31.3%)            |
| Female                        | 9 (45%)                    | 10 (76.9%)         | 11 (68.8%)           |
| Ethnicity, n (%)              |                            |                    |                      |
| Hispanics                     | 14 (70%)                   | 11 (84.6%)         | 14 (87.5%)           |
| Non Hispanics                 | 6 (30%)                    | 2 (15.4%)          | 2 (12.5%)            |
| Hospitalization status, n (%) |                            |                    |                      |
| Inpatients                    | 0                          | 2 (15.4%)          | 12 (75.0%)           |
| Outpatients                   | 20 (100%)                  | 11 (84.6%)         | 4 (25.0%)            |

Table 2. Clinical features of pediatric *Coccidioides*-infected patients.

|                                                         | Resolved<br>(n=13) | Persistent<br>(n=16) |
|---------------------------------------------------------|--------------------|----------------------|
| Fever, n (%)                                            | 11 (94.6%)         | 13 (18.8%)           |
| Cough, n (%)                                            | 7 (53.8%)          | 10 (62.5%)           |
| Chest pains, n (%)                                      | 5 (38.5%)          | 8 (50.0%)            |
| Night sweats, n (%)                                     | 3 (23.1%)          | 5 (31.3%)            |
| Fatigue, n (%)                                          | 4 (30.8%)          | 5 (31.3%)            |
| Weight loss, n (%)                                      | 1 (7.7%)           | 1 (6.3%)             |
| Erythema nodosum, n (%)                                 | 7 (53.8%)          | 3 (18.8%)            |
| # of clinical parameters per patient<br>(avg +/- stdev) | 2.9 +/-1.2         | 2.8+/-1.4            |
| # Medications per patient, n (%)                        |                    |                      |
| 0                                                       | 1 (7.7%)           | 0                    |
| 1                                                       | 12 (92.3%)         | 9 (56.3%)            |
| 2                                                       | 0                  | 4 (25.0%)            |
| 3                                                       | 0                  | 3 (18.8%)            |
| First medication, n (%)                                 |                    |                      |
| Fluconazole                                             | 12 (92.3%)         | 11 (68.6%)           |
| Ambisome                                                | 0                  | 5 (31.3%)            |
| X-ray, n (%)                                            |                    |                      |
| Infiltrates                                             | 6 (46.2%)          | 9 (56.3%)            |
| Consolidation                                           | 4 (30.8%)          | 10 (62.5%)           |
| Adenopathy                                              | 1 (7.7%)           | 4 (25.0%)            |

|            |   |           |
|------------|---|-----------|
| Not tested | 0 | 2 (12.5%) |
|------------|---|-----------|
